# Supplementary material for: Estimating the Delay between Host Infection and Disease (Incubation Period) and Assessing Its Significance to the Epidemiology of Plant Diseases
Source: PubMed Central journal article supplement (PMC3899291; doi:10.1371/journal.pone.0086568), 2014-01-22
Supplement: pone.0086568.s001.pdf [file pone.0086568.s001.pdf]

|    |    |        |         |
|----|----|--------|---------|
| 20 | 74 | 352,9  | 811,15  |
| 20 | 74 | 352,9  | 811,15  |
| 20 | 74 | 352,9  | 811,15  |
| 20 | 74 | 352,9  | 811,15  |
| 20 | 74 | 352,9  | 811,15  |
| 20 | 74 | 352,9  | 811,15  |
| 20 | 74 | 352,9  | 811,15  |
| 21 | 74 | 371,05 | 811,15  |
| 21 | 74 | 371,05 | 811,15  |
| 21 | 74 | 371,05 | 811,15  |
| 21 | 74 | 371,05 | 811,15  |
| 21 | 74 | 371,05 | 811,15  |
| 21 | 74 | 371,05 | 811,15  |
| 21 | 74 | 371,05 | 811,15  |
| 21 | 74 | 371,05 | 811,15  |
| 21 | 74 | 371,05 | 811,15  |
| 21 | 74 | 371,05 | 811,15  |
| 21 | 74 | 371,05 | 811,15  |
| 21 | 74 | 371,05 | 811,15  |
| 21 | 74 | 371,05 | 811,15  |
| 21 | 74 | 371,05 | 811,15  |
| 21 | 74 | 371,05 | 811,15  |
| 21 | 74 | 371,05 | 811,15  |
| 21 | 74 | 371,05 | 811,15  |
| 28 | 74 | 492,2  | 811,15  |
| 28 | 74 | 492,2  | 811,15  |
| 28 | 74 | 492,2  | 811,15  |
| 28 | 74 | 492,2  | 811,15  |
| 28 | 74 | 492,2  | 811,15  |
| 28 | 74 | 492,2  | 811,15  |
| 28 | 74 | 492,2  | 811,15  |
| 31 | 74 | 543,95 | 811,15  |
| 31 | 74 | 543,95 | 811,15  |
| 31 | 74 | 543,95 | 811,15  |
| 17 | 88 | 301,15 | 1053,95 |
| 17 | 88 | 301,15 | 1053,95 |
| 17 | 88 | 301,15 | 1053,95 |
| 17 | 88 | 301,15 | 1053,95 |
| 17 | 88 | 301,15 | 1053,95 |
| 17 | 88 | 301,15 | 1053,95 |
| 17 | 88 | 301,15 | 1053,95 |
| 17 | 88 | 301,15 | 1053,95 |
| 17 | 88 | 301,15 | 1053,95 |
| 17 | 88 | 301,15 | 1053,95 |
| 22 | 88 | 388,1  | 1053,95 |
| 22 | 88 | 388,1  | 1053,95 |
| 22 | 88 | 388,1  | 1053,95 |
| 23 | 88 | 405,95 | 1053,95 |
| 23 | 88 | 405,95 | 1053,95 |
| 23 | 88 | 405,95 | 1053,95 |
| 23 | 88 | 405,95 | 1053,95 |
| 23 | 88 | 405,95 | 1053,95 |
| 23 | 88 | 405,95 | 1053,95 |
| 23 | 88 | 405,95 | 1053,95 |
| 23 | 88 | 405,95 | 1053,95 |
| 23 | 88 | 405,95 | 1053,95 |
| 28 | 88 | 491,05 | 1053,95 |



|    |     |        |         |
|----|-----|--------|---------|
| 29 | 102 | 476,5  | 1303,35 |
| 29 | 102 | 476,5  | 1303,35 |
| 29 | 102 | 476,5  | 1303,35 |
| 29 | 102 | 476,5  | 1303,35 |
| 29 | 102 | 476,5  | 1303,35 |
| 29 | 102 | 476,5  | 1303,35 |
| 29 | 102 | 476,5  | 1303,35 |
| 29 | 102 | 476,5  | 1303,35 |
| 29 | 102 | 476,5  | 1303,35 |
| 29 | 102 | 476,5  | 1303,35 |
| 29 | 102 | 476,5  | 1303,35 |
| 29 | 102 | 476,5  | 1303,35 |
| 29 | 102 | 476,5  | 1303,35 |
| 29 | 102 | 476,5  | 1303,35 |
| 29 | 102 | 476,5  | 1303,35 |
| 31 | 102 | 506,8  | 1303,35 |
| 31 | 102 | 506,8  | 1303,35 |
| 31 | 102 | 506,8  | 1303,35 |
| 31 | 102 | 506,8  | 1303,35 |
| 31 | 102 | 506,8  | 1303,35 |
| 31 | 102 | 506,8  | 1303,35 |
| 31 | 102 | 506,8  | 1303,35 |
| 31 | 102 | 506,8  | 1303,35 |
| 31 | 102 | 506,8  | 1303,35 |
| 31 | 102 | 506,8  | 1303,35 |
| 36 | 102 | 587,2  | 1303,35 |
| 36 | 102 | 587,2  | 1303,35 |
| 15 | 116 | 234,85 | 1545    |
| 17 | 116 | 265,15 | 1545    |
| 17 | 116 | 265,15 | 1545    |
| 17 | 116 | 265,15 | 1545    |
| 17 | 116 | 265,15 | 1545    |
| 17 | 116 | 265,15 | 1545    |
| 17 | 116 | 265,15 | 1545    |
| 17 | 116 | 265,15 | 1545    |
| 17 | 116 | 265,15 | 1545    |
| 22 | 116 | 345,55 | 1545    |
| 22 | 116 | 345,55 | 1545    |
| 22 | 116 | 345,55 | 1545    |
| 22 | 116 | 345,55 | 1545    |
| 22 | 116 | 345,55 | 1545    |
| 28 | 116 | 435,25 | 1545    |
| 28 | 116 | 435,25 | 1545    |
| 28 | 116 | 435,25 | 1545    |
| 28 | 116 | 435,25 | 1545    |
| 28 | 116 | 435,25 | 1545    |
| 31 | 116 | 478,1  | 1545    |
| 31 | 116 | 478,1  | 1545    |
| 31 | 116 | 478,1  | 1545    |
| 31 | 116 | 478,1  | 1545    |
| 31 | 116 | 478,1  | 1545    |
| 31 | 116 | 478,1  | 1545    |
| 31 | 116 | 478,1  | 1545    |
| 31 | 116 | 478,1  | 1545    |
| 34 | 116 | 523    | 1545    |
| 34 | 116 | 523    | 1545    |





|    |     |        |         |
|----|-----|--------|---------|
| 37 | 130 | 535,95 | 1764,85 |
| 37 | 130 | 535,95 | 1764,85 |
| 37 | 130 | 535,95 | 1764,85 |
| 43 | 130 | 604,7  | 1764,85 |
| 43 | 130 | 604,7  | 1764,85 |
| 43 | 130 | 604,7  | 1764,85 |
| 55 | 130 | 756,5  | 1764,85 |
| 55 | 130 | 756,5  | 1764,85 |
| 55 | 130 | 756,5  | 1764,85 |
| 55 | 130 | 756,5  | 1764,85 |
| 57 | 130 | 779,8  | 1764,85 |
| 57 | 130 | 779,8  | 1764,85 |
| 59 | 130 | 802,05 | 1764,85 |
| 59 | 130 | 802,05 | 1764,85 |
| 59 | 130 | 802,05 | 1764,85 |
