# Supplementary material for: Estimating the Delay between Host Infection and Disease (Incubation Period) and Assessing Its Significance to the Epidemiology of Plant Diseases
Source: PubMed Central journal article supplement (PMC3899291; doi:10.1371/journal.pone.0086568), 2014-01-22
Supplement: pone.0086568.s002.pdf [file pone.0086568.s002.pdf]

## Appendix S2 : Distribution Analysis

### 1. Probability distributions

#### 1.1. Gamma, Erlang and exponential distributions

- The Gamma distribution is a two-parameter continuous-variable probability distribution with density function:

$$f(x, k, \lambda) = \frac{\lambda^k x^{k-1}}{\Gamma(k)} e^{-\lambda x} \quad (\text{s.1})$$

For  $x \geq 0$ ,  $k > 0$  (shape parameter), and  $\lambda > 0$  (rate parameter), and where  $\Gamma()$  is the gamma function

- The Erlang distribution is a particular case of the Gamma distribution when the shape parameter  $k$  is an integer. The *pdf* of the Erlang distribution is:

$$f(x, k, \lambda) = \frac{\lambda^k x^{k-1}}{(k-1)!} e^{-\lambda x} \quad (\text{s.2})$$

For  $x \geq 0$ ,  $\lambda > 0$ , and  $k$  a positive integer.

- The exponential distribution is an Erlang distribution with shape parameter  $k=1$ ; it has *pdf*:

$$f(x, \lambda) = \lambda e^{-\lambda x} \quad (\text{s.3})$$

#### 1.2. Weibull distribution

The Weibull distribution is a two-parameter continuous-variable probability distribution with *pdf*:

$$f(x, k, \lambda) = \lambda k (\lambda x)^{k-1} e^{-(\lambda x)^k} \quad (\text{s.4})$$

For  $x \geq 0$ ,  $k > 0$  (shape parameter) and  $\lambda > 0$  (rate parameter).

#### 1.3. Lognormal distribution

The Lognormal distribution is a two-parameter probability distribution of a continuous random variable whose logarithm is normally distributed. The *pdf* of a log-normal distribution is:

$$f(x, \mu, \sigma) = \frac{1}{x\sigma\sqrt{2\pi}} e^{-\frac{(\ln(x)-\mu)^2}{2\sigma^2}} \quad (\text{s.5})$$

For  $x \geq 0$ , and where  $\mu$  and  $\sigma$  are the mean and standard deviation of the logarithm of  $x$ .

## 2. Age-by-age fitted probability density functions (*pdf*): Figure S.1

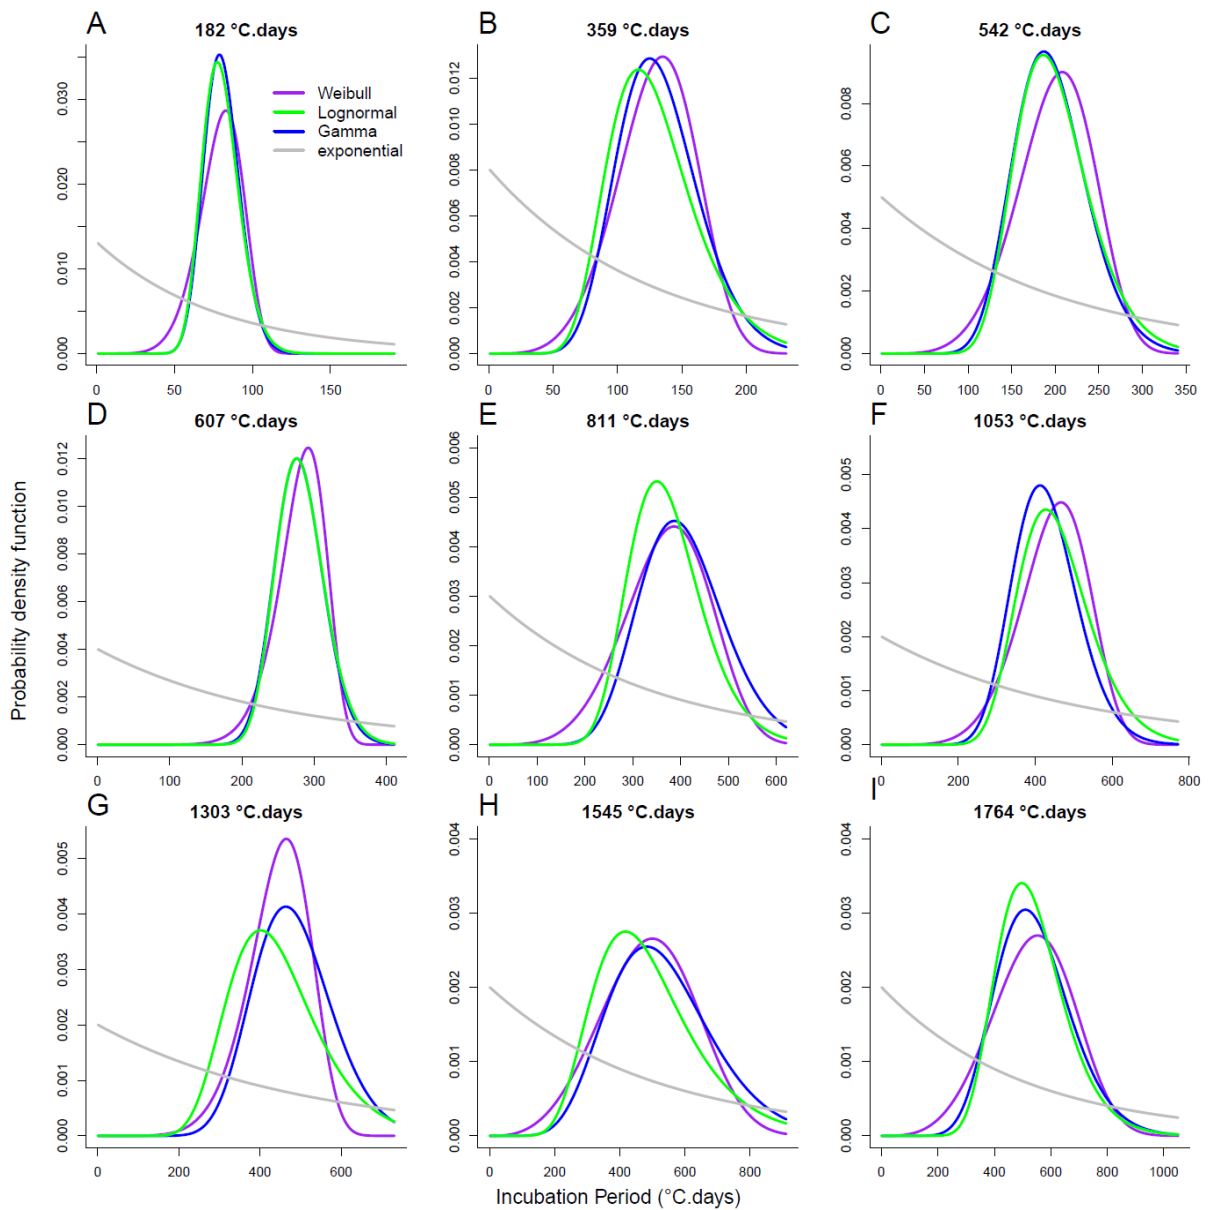

**Figure S.1** Probability density functions of the distribution models fitted to the incubation period data by host age: Gamma (blue line) Lognormal (green), Weibull (purple) and exponential (grey). Age of host plants at inoculation: (A) 18 days (182 °C.days), (B) 32 days (359 °C.days), (C) 46 days (542 °C.days), (D) 60 days (607 °C.days), (E) 74 days (811 °C.days), (F) 88 days (1053 °C.days), (G) 102 days (1303 °C.days), (H) 116 days (1545 °C.days) ,and (I) 130 days (1764 °C.days).
